# Supplementary material for: Synthesis and characterization of a series of nickel(ii) alkoxide precursors and their utility for Ni(0) nanoparticle production
Source: Royal Society of Chemistry journal article supplement (doi:10.1039/c6dt04083g), 2017-01-01

## Supporting Information for:

Synthesis and characterization of a series of nickel(II) alkoxide precursors and their utility for  
Ni(0) nanoparticle production

by

LaRico J. Treadwell, Timothy J. Boyle\* Marie V. Parkes,

Adam Phelan,<sup>a</sup> David P. Young,<sup>a</sup>

### *List of Supporting Figures*

**Figure S1.** Structure plot of **2**. Thermal ellipsoids of heavy atoms drawn at the 30% level and carbon atoms represented by ball and stick diagrams for clarity.

**Figure S2.** Structure plot of **3**. Thermal ellipsoids of heavy atoms drawn at the 30% level and carbon atoms represented by ball and stick diagrams for clarity.

**Figure S3.** UV-vis spectra for **2** (◆ calculated singlet; = x calculated triplet, ■ experimental).

**Figure S4.** UV-vis spectra for **3** (◆ calculated singlet; = x calculated triplet, ■ experimental).

**Figure S5.** UV-vis spectra for **4** (◆ calculated singlet; = x calculated triplet, ■ experimental).

**Figure S6.** UV-vis spectra for **5** (◆ calculated singlet; = x calculated triplet, ■ experimental).

**Figure S7.** UV-vis spectra for **6** (◆ calculated singlet; = x calculated triplet, ■ experimental).

**Figure S8.** TGA analysis of **1** taken at 25 – 550 °C at a rate of 5 °C per minute under flowing argon.

**Figure S9.** TGA analysis of **6** taken at 25 – 550 °C at a rate of 5 °C per minute under flowing argon.

**Figure S10.** PXRD for the resultant materials from TGA analysis of **1** taken at a range of 10 - 90° with a scan rate of 0.15 °/sec.

**Figure S11.** PXRD for the resultant materials from TGA analysis of **6** taken at a range of 10 - 90° with a scan rate of 0.15 °/sec.

**Figure S12.** FTIR spectral data (shown from 3800 to 2400  $\text{cm}^{-1}$ ) for the resultant nanoparticles from **1** and **6**.

**Figure S1.** Stick representation of the structure of  $\text{Ni}(\text{L})_2$  showing the displacement ellipsoids at the 50% probability level. The carbon atoms are shown as spheres of arbitrary radii.

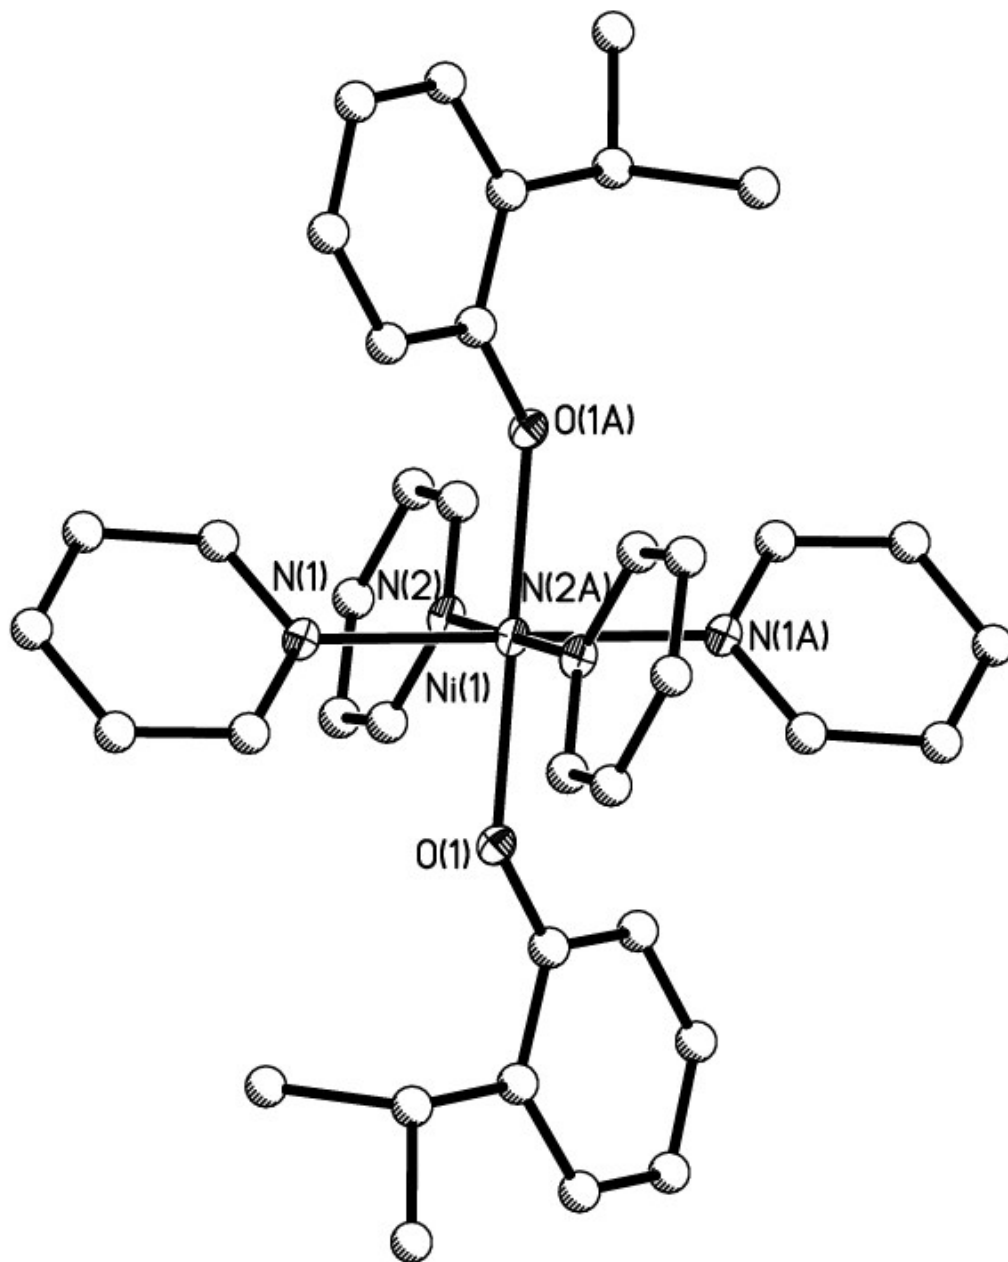

**Figure S2.** Structure plot of **3**. Thermal ellipsoids of heavy atoms drawn at the 30% level and carbon atoms represented by ball and stick diagrams for clarity.

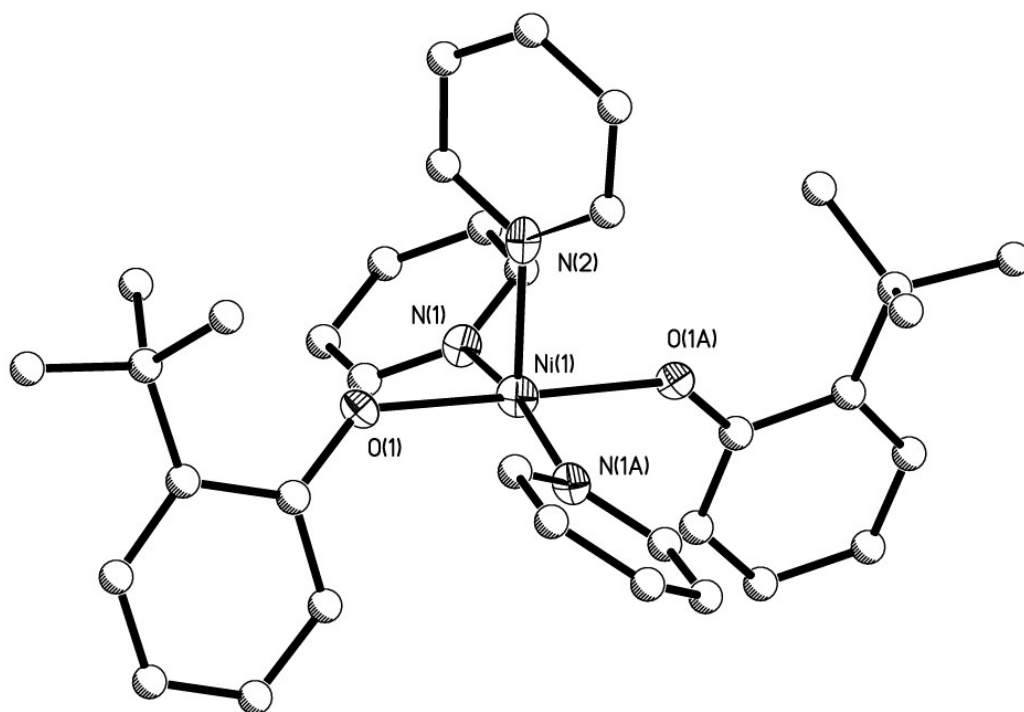

Figure S3. UV-vis spectra for **2** (◆ calculated singlet; × calculated triplet, ■ experimental).

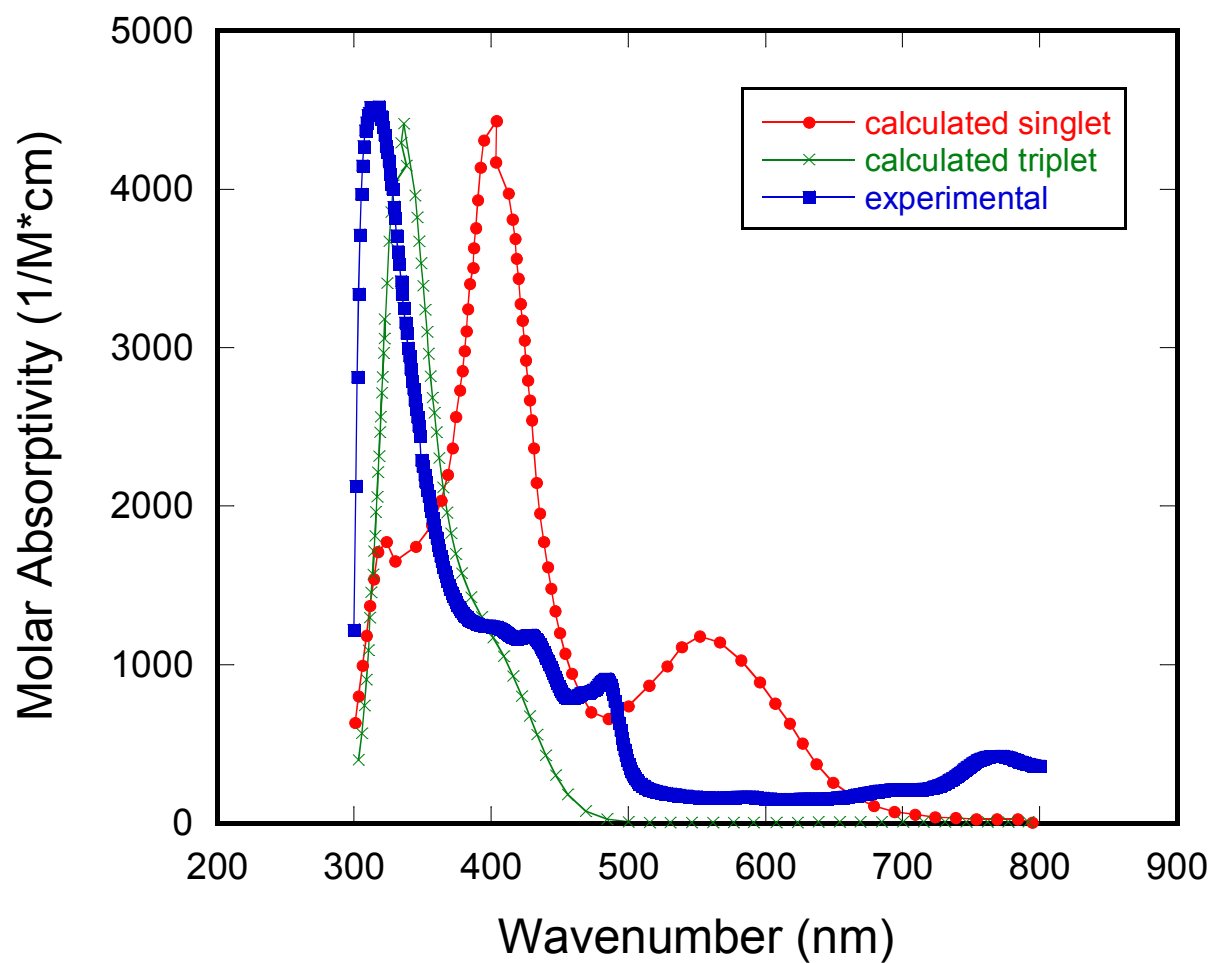

Figure S4. UV-vis spectra for **3** (◆ calculated singlet; × calculated triplet, ■ experimental).

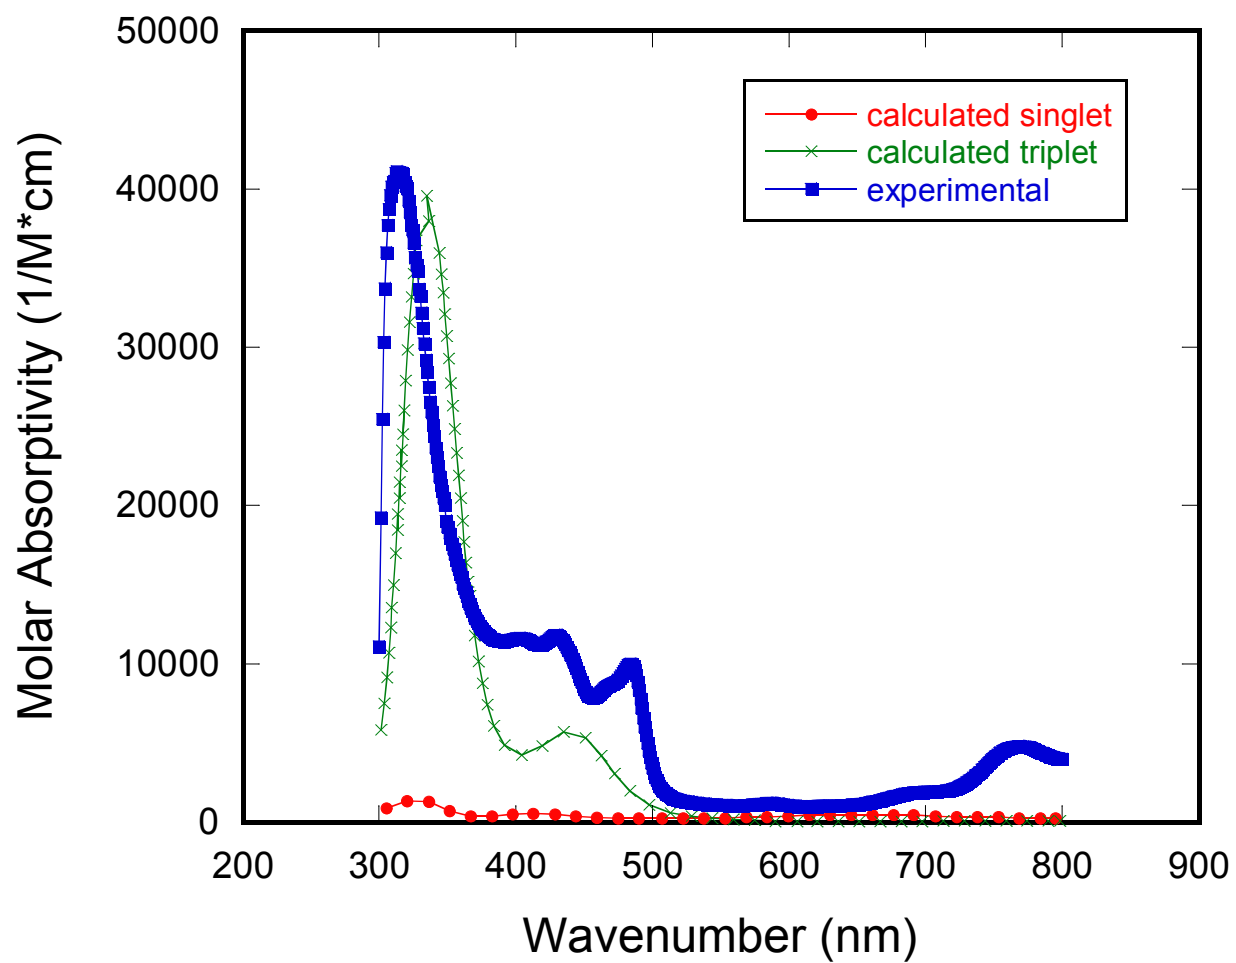

Figure S5. UV-vis spectra for **4** (◆ calculated singlet; × calculated triplet, ■ experimental).

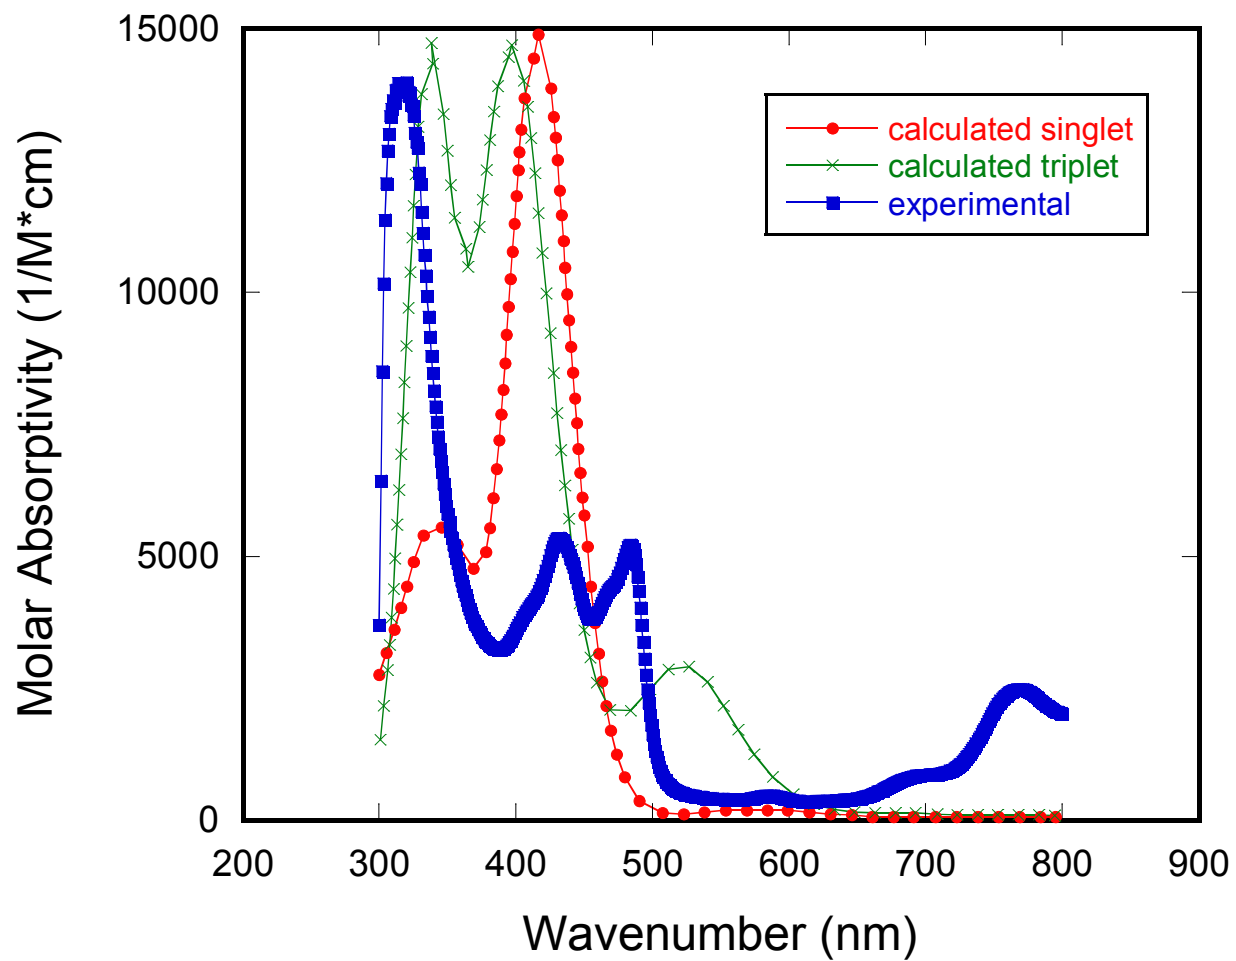

Figure S6. UV-vis spectra for **5** (◆ calculated singlet; × calculated triplet, ■ experimental).

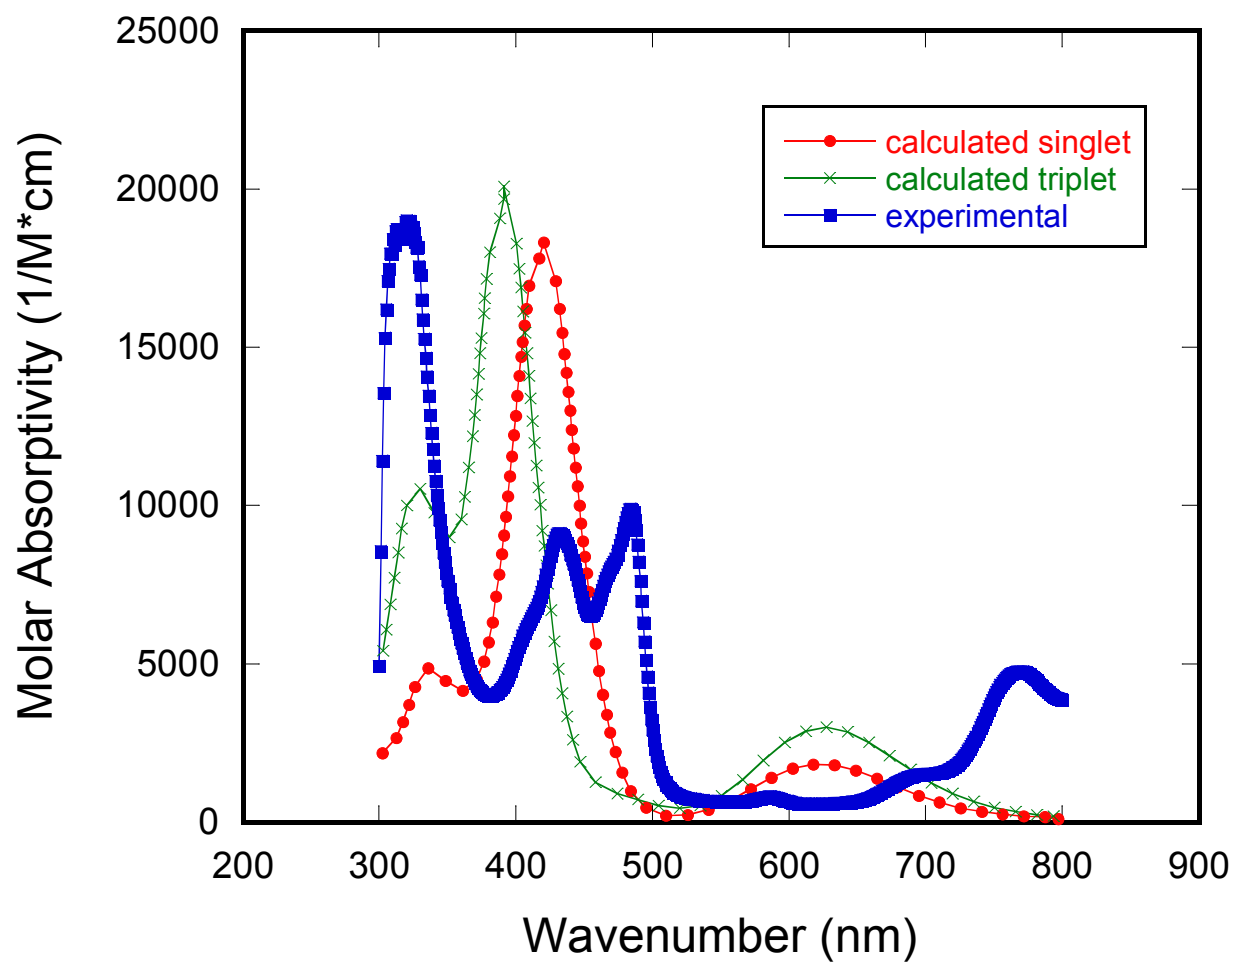



Figure S7. UV-vis spectra for **6** (◆ calculated singlet; × calculated triplet, ■ experimental).

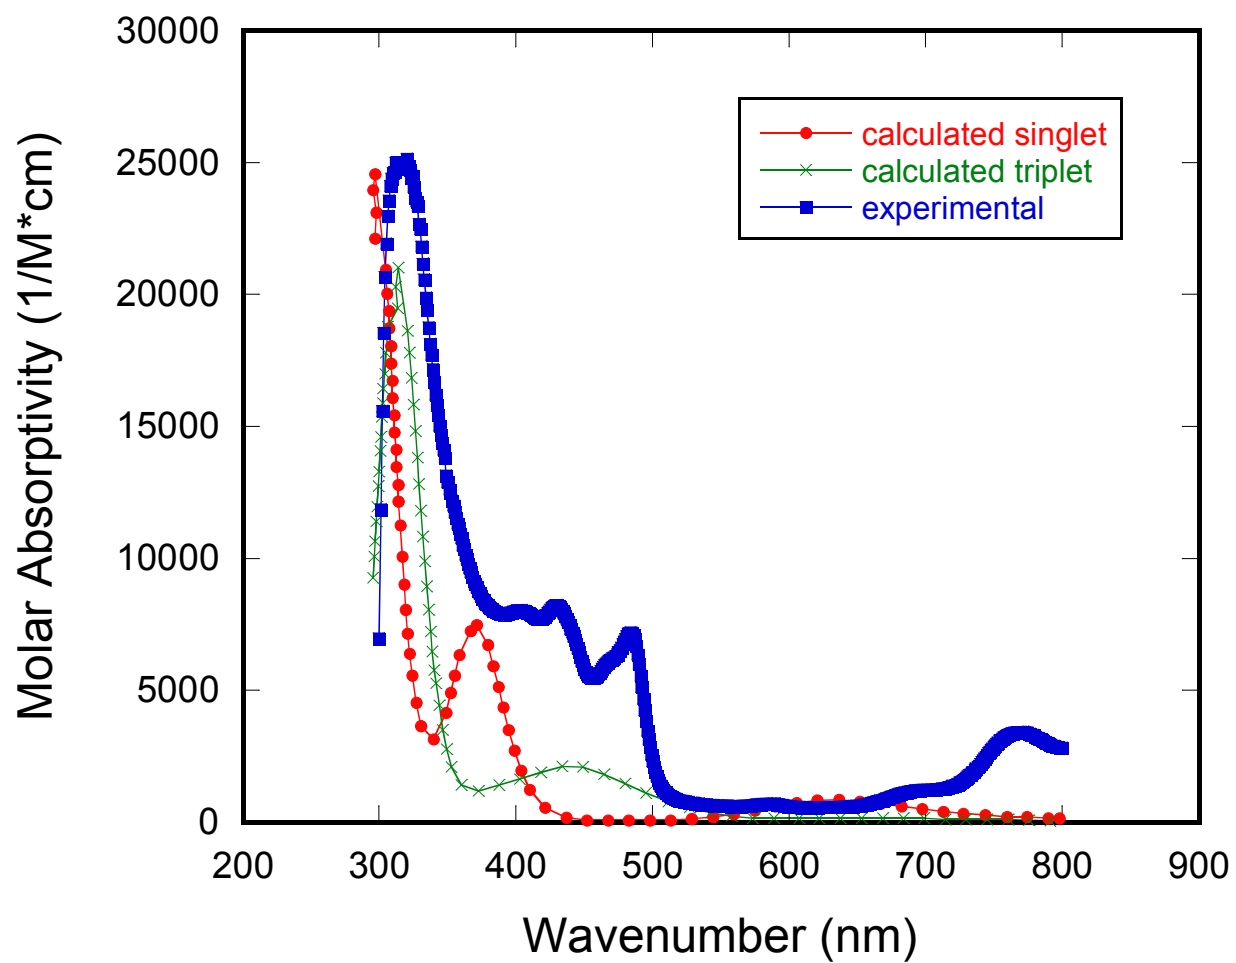

**Figure S8.** TGA analysis of **1** taken at 25 – 550 °C at a rate of 5 °C per minute under flowing argon.

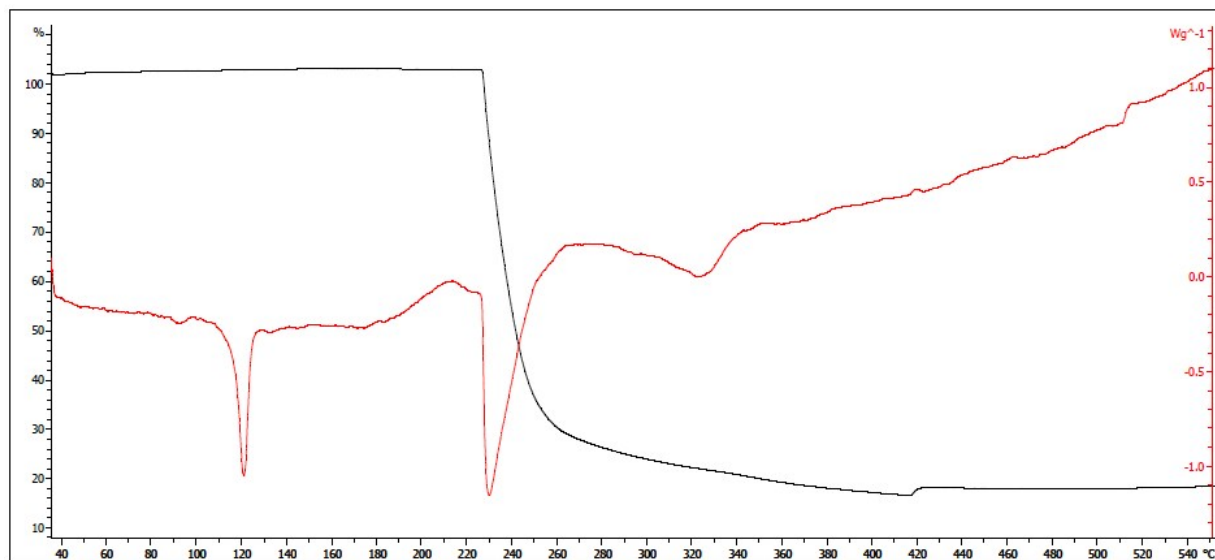

**Figure S9.** TGA analysis of **6** taken at 25 – 550 °C at a rate of 5 °C per minute under flowing argon.

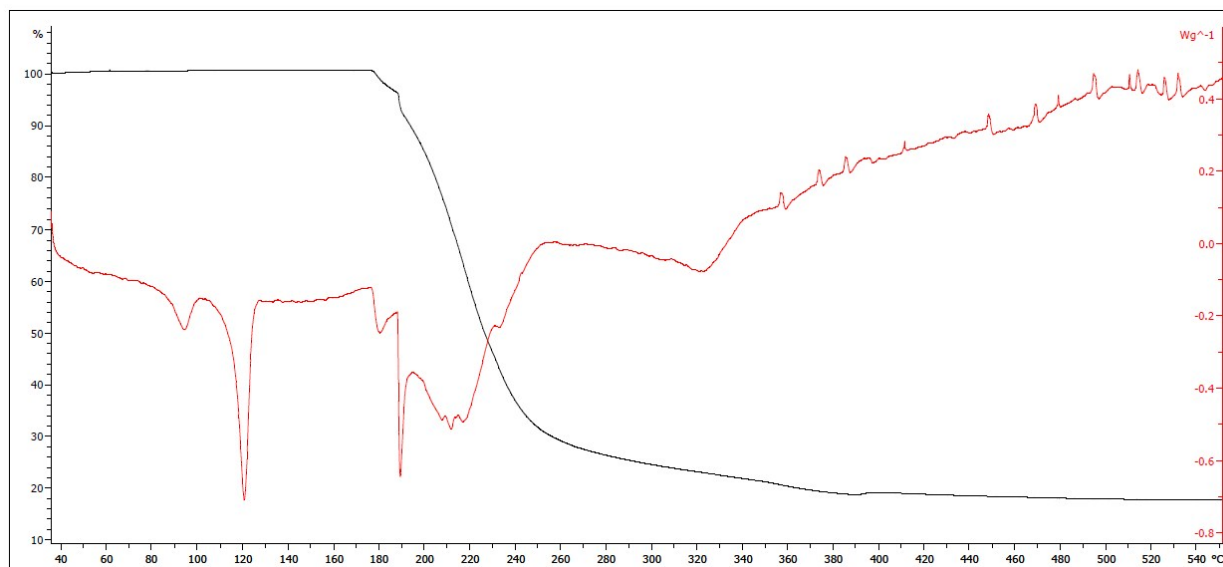

**Figure S10.** PXRD for the resultant materials from TGA analysis of **1** taken at a range of 10-90° with a scan rate of 0.15 °/sec.

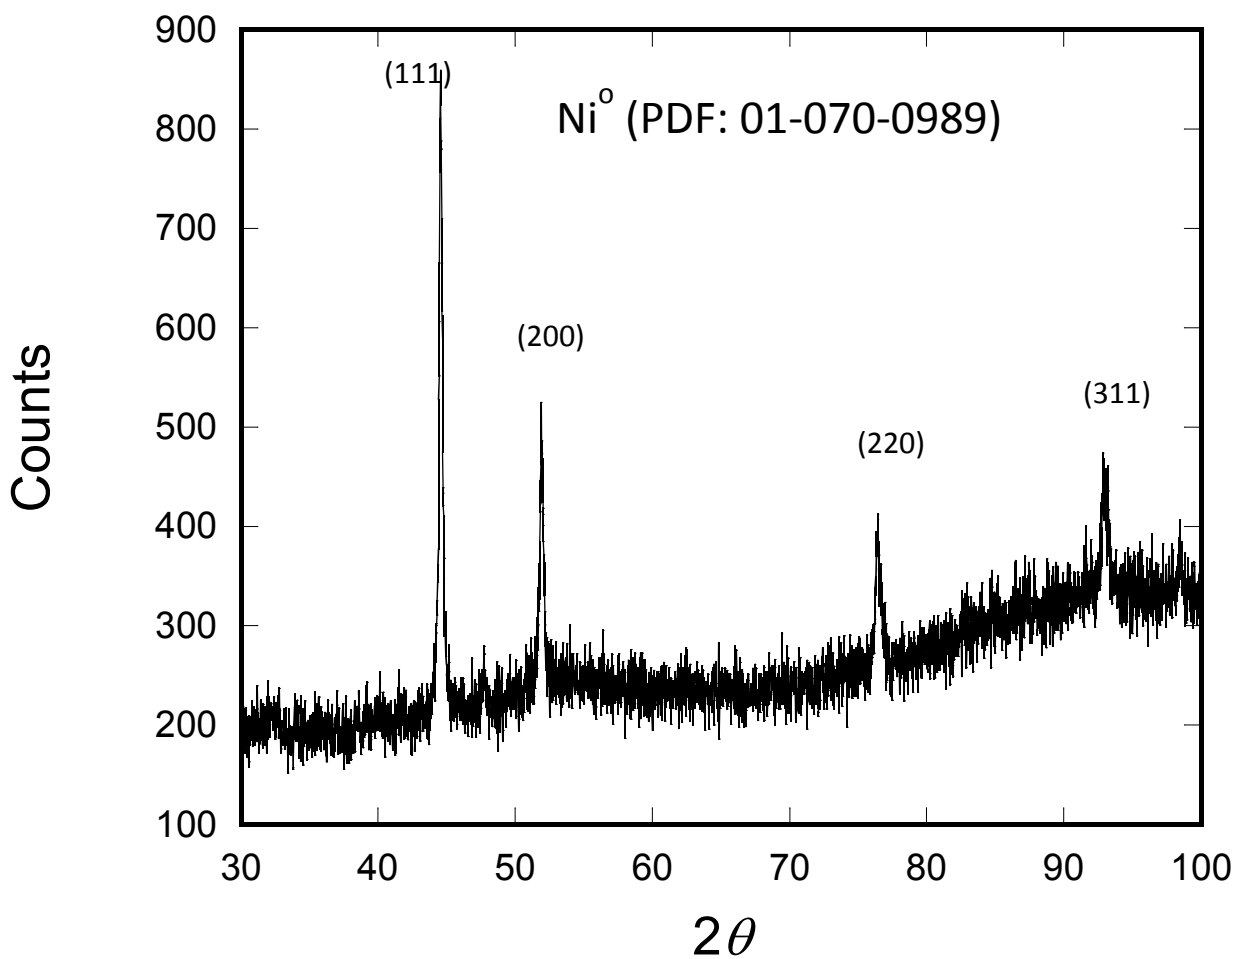

**Figure S11.** PXRD for the resultant materials from TGA analysis of **6** taken at a range of 10-90° with a scan rate of 0.15 °/sec.

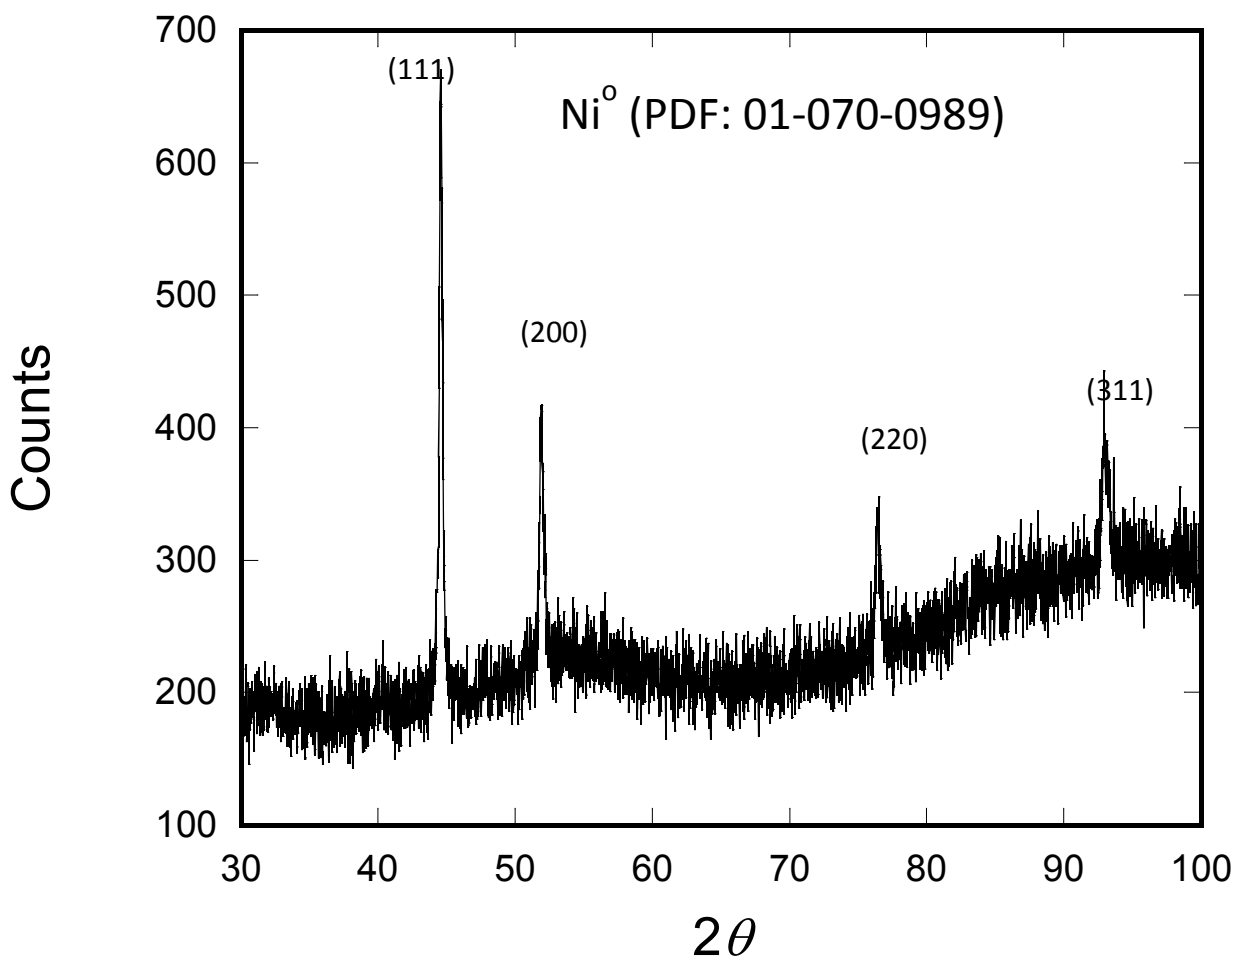

**Figure S12.** FTIR spectral data (shown from 3800 to 2400  $\text{cm}^{-1}$ ) for the resultant nanoparticles from the decomposition of **1** and **6**.

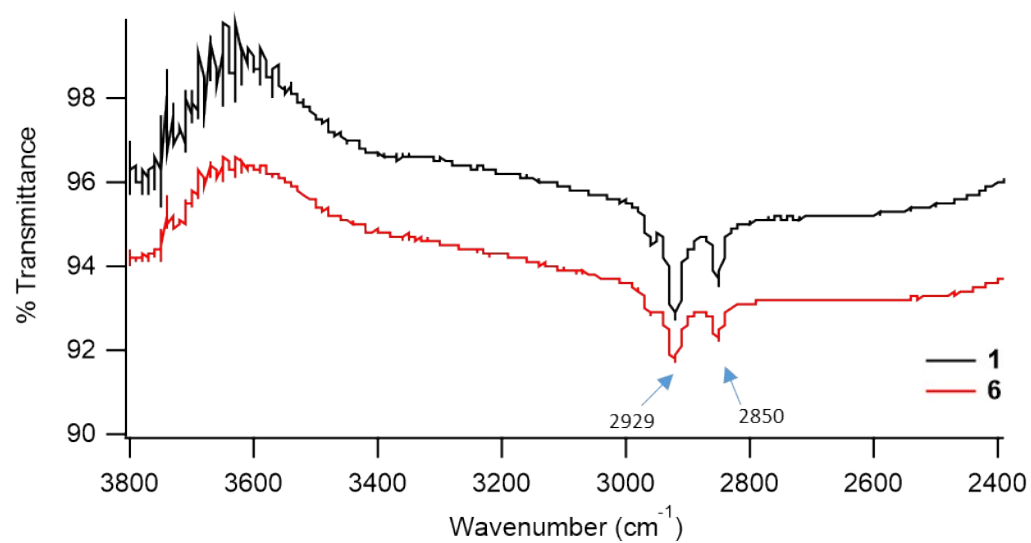

Supplement: c6dt04083g1.pdf [file c6dt04083g1.pdf]
